# Supplementary material
Source: PubMed Central journal article supplement (PMC4165444)
Supplement: bi5006442_si_001.pdf [file bi5006442_si_001.pdf]

**Supporting Information for**  
**Yeast Alcohol Dehydrogenase Structure and Catalysis**

Savarimuthu Baskar Raj<sup>†</sup>, S. Ramaswamy<sup>‡</sup>, and Bryce V. Plapp\*

Department of Biochemistry, The University of Iowa, Iowa City, IA 52242 United States

Corresponding author

\*E-mail: [bv-plapp@uiowa.edu](mailto:bv-plapp@uiowa.edu). Phone: (319) 335-7909. Fax: (319) 335-9570.

Present addresses

<sup>†</sup>Lawson State Community College, Birmingham, AL 35216. E-mail: [baskarraaj\\_75@yahoo.co.in](mailto:baskarraaj_75@yahoo.co.in)

<sup>‡</sup>Institute for Stem Cell Biology and Regenerative Medicine (inSTEM), National Center for Biological Sciences, GKVK Post, Bellary Road, Bangalore 560065, India. E-mail: [ramas@instem.res.in](mailto:ramas@instem.res.in)

This file contains text, tables and figures in the order that they are referred to the article.

**Table 1S. Structural Comparisons of Domains and Subunits<sup>a</sup>**

| transformation,<br>subunit(s) | coenzyme<br>domain(s) | catalytic<br>domain(s) | coenzyme and<br>catalytic |
|-------------------------------|-----------------------|------------------------|---------------------------|
| B onto A                      | 0.94                  | 0.86                   | 1.94                      |
| C onto A                      | 0.27                  | 0.32                   | 0.30                      |
| D onto A                      | 0.71                  | 0.90                   | 1.97                      |
| C onto B                      | 0.96                  | 0.86                   | 1.97                      |
| D onto B                      | 0.64                  | 0.44                   | 0.54                      |
| D onto C                      | 0.77                  | 0.93                   | 2.01                      |
| CD onto AB                    | 0.52                  | 0.40                   | 0.45                      |
| BA onto AB                    | 1.02                  | 1.50                   | 1.04                      |

<sup>a</sup>Root-mean-square deviation (Å) after superpositioning alpha carbon atoms of the residues in the subunit or dimer using the program O. The catalytic domain includes residues 1–154 and 294–347, and the coenzyme binding domain includes residues 155–293.

**Table 2S. Accessible Surface Areas, Å<sup>2</sup>, of Subunits and Oligomers<sup>a</sup>**

| subunit | area  | dimer/<br>difference | area<br>(buried) | tetramer/<br>difference | area<br>(buried) |
|---------|-------|----------------------|------------------|-------------------------|------------------|
| A       | 14900 | AB                   | 26900            | AB:AB                   | 49400            |
| B       | 15500 | A + B – AB           | (3500)           | 2AB – AB:AB             | (4400)           |
| C       | 14900 | CD                   | 27200            | CD:CD                   | 50000            |
| D       | 15800 | C + D – CD           | (3500)           | 2CD – CD:CD             | (4400)           |
|         |       |                      |                  | AB:CD                   | 52400            |
|         |       |                      |                  | AB + CD – AB:CD         | (1700)           |

<sup>a</sup>Calculated with CCP4 ArealMol and PDBE-Pisa.

## Figure 1S. Oligomeric Interactions in Yeast ADH1

Red, electrostatic; black, hydrogen bonds; brown, covalent; blue, hydrophobic. Distances in Å.

### Intra-dimeric

#### A subunit to B subunit (interface 1515 Å<sup>2</sup>)

101 Glu OE2, OE1 – 260 Arg NE, NH2 2.6, 2.8  
279 Asp OD1 – 275 Lys NZ 2.8  
102 Tyr OH – Wat – 261 Ala N 2.9, 2.6  
107 Asn OD1 – Wat – 262 Asn OD1 2.6, 2.5  
110 Asn ND2 – 287 Ser OG 2.8  
237 Gly O – Wat – 102 Tyr OH 3.0, 2.6  
274 Ala O – 280 Val N 2.9  
274 Ala O – Wat – 281 Phe N 2.8, 2.6  
276 Cys N – 278 Ser O 2.7  
277 Cys S – 277 Cys S 2.0  
278 Ser N – 276 Cys O 3.0  
283 Gln NE2 – 290 Ile O 2.9  
288 Ile O – 292 Gly N 3.0  
290 Ile N – 290 Ile O 2.8  
54 Trp CB, CG, CE3 – 281 Phe CE2 3.6, 3.6  
55 Pro CG – 281 Phe CD1, CE1 3.6, 3.8  
284 Val CG2 – 267 Leu CB 3.9  
267 Leu CD1 – 276 Cys CB 4.1  
270 Met CB – 54 Trp CZ2 3.8  
270 Met SD – 281 Phe CD2 3.7  
274 Ala CB – 280 Val CB, CG2 3.9, 3.9  
285 Val CA – 294 Tyr CG 3.9  
260 Arg NH2 – 101 Glu OE1 3.1  
240 His NE2 – 101 Glu OE2 3.2  
261 Ala N – Wat – 102 Tyr OH 3.4, 2.6  
110 Asn OD1 – 262 Asn ND2 3.0  
110 Asn ND2 – 285 Val O 3.0  
280 Val N – 274 Ala O 3.0  
274 Ala O – Wat – 279 Asp OD1 2.8, 2.7  
276 Cys O – 278 Ser N 2.9  
276 Cys O – Wat – 276 Cys O, 2.9, 2.7  
278 Ser O – 276 Cys N 2.9  
290 Ile O – 283 Gln NE2 3.0  
292 Gly N – 288 Ile O 2.8  
290 Ile O – 290 Ile N 2.7  
281 Phe CE2 – 54 Trp CD1 4.0  
281 Phe CE2 – 270 Met CE 3.4  
280 Val CG1 – 271 Pro CG, CD 3.2, 3.5  
270 Met CA – 280 Val CG1 4.0  
270 Met CE – 284 Val CG1 3.7  
280 Val CG2 – 274 Ala CB 3.7  
294 Tyr CZ – 285 Val CG2 3.8

#### C subunit to D subunit (interface 1480 Å<sup>2</sup>)

101 Glu OE1, OE2 – 260 Arg NE, NH2 2.9, 3.4  
110 Asn OD1 – 262 Asn ND2 3.1  
110 Asn ND2 – 285 Val O 3.1  
285 Val O – 110 Asn ND2 2.9  
237 Gly O – Wat – 102 Tyr OH 3.0, 2.8  
261 Ala N – Wat – 102 Tyr OH 2.7, 2.8  
274 Ala O – 280 Val N 3.1  
276 Cys N – 278 Ser O 2.8  
277 Cys S – 277 Cys S 2.0  
278 Ser N – 276 Cys O 3.3  
283 Gln NE2 – 290 Ile O 3.2  
288 Ile O – 292 Gly N 2.7  
290 Ile N – 290 Ile O 2.8  
54 Trp CB, CG, CD2 – 281 Phe CE1 3.6, 3.6, 3.7  
55 Pro CG – 281 Phe CD2, CE2 3.5, 3.5  
267 Leu CB – 284 Val CG2 3.7  
270 Met CG – 284 Val CB, CG1 4.1, 4.1  
260 Arg NE, NH2 – 101 – Glu OE2, OE1 2.8, 2.7  
262 Asn ND2 – 110 Asn OD1 3.2  
110 Asn ND2 – 287 Ser OG 2.8  
285 Val O – Wat – 110 Asn OD1 2.8, 3.2  
236 Asp O – Wat – 102 Tyr OH 3.3, 2.7  
280 Val N – 274 Ala O 3.1  
276 Cys O – 278 Ser N 2.8  
278 Ser O – 276 Cys N 3.1  
290 Ile O – 283 Gln NE2 3.2  
292 Gly N – 288 Ile O 2.8  
290 Ile O – 290 Ile N 2.6  
281 Phe CE2 – 54 Trp CE2, CD2 4.1, 4.1  
270 Met SD – 281 Phe CD1 3.8  
284 Val CG2 – 267 Leu CB 3.9  
284 Val CG1 – 270 Met CG, SD 3.7, 3.7

280 Val CG2 – 274 Ala CB 3.7  
285 Val CG2 – 294 Tyr CE1, CZ 3.9, 3.8  
287 Ser CA – 292 Gly C 3.9

280 Val CG2 – 275 Lys CA 3.8  
294 Tyr CE1, CZ – 285 Val CG2 3.8, 3.8  
292 Gly C – 287 Ser CA 3.9

### Interactions in the A1B1:A2B2 Tetramer

**A1 to A2 subunits** (642 Å<sup>2</sup>, additional symmetry-related A2 to A1 interactions implied)

104 Glu OE1,OE2 – 302 Arg NE,NH2 3.2, 2.8  
98 Met O – 298 Arg NH1 2.9  
78 Asn CG – 78 Asn CG 3.0  
104 Glu CD – 298 Arg CB 3.8

78 Asn OD1 – 80 Lys NZ 3.0  
104 Glu O – Wat – 108 Glu OE2 2.6, 2.8  
101 Glu CA – 302 Arg CZ 3.7  
105 Leu CD2 – 299 Ala CB 3.8

**A1 to B2 subunits** (454 Å<sup>2</sup>, additional symmetry-related A2 to B1 interactions implied)

159 Tyr OH – Wat – 169 Ala O 2.7, 2.7  
192 Ala O – Wat – 194 Gly O 3.2, 2.7  
194 Gly O – Wat – 310 Arg NH2 2.7, 3.2  
163 Lys CD – 168 Met CE 3.5  
169 Ala CB – 193 Met CA 3.6  
169 Ala CB – 307 Phe CZ 3.8  
196 Arg CD, CZ – 310 Arg CZ, CD 3.8, 3.9

169 Ala O – Wat – 159 Tyr OH 2.8, 3.0  
194 Gly O – Wat – 192 Ala O 2.7, 2.5  
310 Arg NH2 – Wat – 194 Gly O 2.7, 2.7  
168 Met CE – 163 Lys CE 3.3  
193 Met CA – 169 Ala CB 3.8  
307 Phe CZ – 169 Ala CB 4.2  
310 Arg CD, CZ – 196 Arg CZ, CD 3.4, 3.8

**B1 to B2 subunits** (899 Å<sup>2</sup>, additional symmetry-related B2 to B1 interactions implied)

104 Glu OE2 – 302 Arg NH1 3.0  
30 Ala CB – 30 Ala CB 4.2  
81 Gly CA – 99 Ala CB 3.8  
105 Leu CD2 – 299 Ala CB 3.8

98 Met O – Wat – 133 Ala O 2.9, 2.9  
78 Asn CG – 78 Asn CG 3.8  
98 Met CB – 134 Val CG2 4.1

### Interactions in the C1D1:C2D2 Tetramer

**C1 to C2 subunits** (660 Å<sup>2</sup>, additional symmetry-related C2 to C1 interactions implied)

104 Glu OE1, OE2 – 302 Arg NE, NH2 2.9, 2.9  
78 Asn CG – 78 Asn CG 3.2  
105 Leu CD2 – 299 Ala CB 3.8

98 Met O – 298 Arg NH1 2.8  
98 Met CE – 98 Met CE 3.8

**C1 to D2 subunits** (442 Å<sup>2</sup>, additional symmetry-related C2 to D1 interactions implied)

159 Tyr OH – Wat – 169 Ala O 2.5, 2.8  
163 Lys CD – 168 Met CE 3.6  
169 Ala CB – 193 Met CA 3.7  
169 Ala CB – 307 Phe CZ 4.2  
196 Arg CD, CZ – 310 Arg CZ, CD 4.0, 4.1

168 Met CE – 163 Lys CD 4.1  
193 Met CA – 169 Ala CB 3.6  
307 Phe CZ – 170 Gly CA 3.8  
310 Arg CD, CZ – 196 Arg CZ, CD 3.3, 3.9

**D1 to D2 subunits** (914 Å<sup>2</sup>, additional symmetry-related D2 to D1 interactions implied)

104 Glu OE2 – 302 Arg NH1 2.4  
104 Glu OE2 – Wat – 298 Arg O 3.0, 2.6  
31 Asn OD1 – 78 Asn ND2 3.1  
81 Gly O – Wat – 99 Ala O 2.8, 2.6  
30 Ala CB – 30 Ala CB 4.0  
99 Ala CB – 138 His CE1 3.5

104 Glu OE2–Wat–Wat–91 Lys NZ 3.0,2.7,2.9  
104 Glu OE1–Wat–Wat–303 Glu OE2 2.7,2.7,2.9  
78 Asn OD1 – Wat – 78 Asn OD1 2.9, 3.0  
98 Met O – 298 Arg NH1 3.0  
81 Gly CA – 99 Ala CB 3.7  
105 Leu CD2 – 299 Ala CB 4.1

**Figure 2S.** Disulfide bond between cysteine residues 277 in subunits A and B. The bond is also found between subunits C and D.

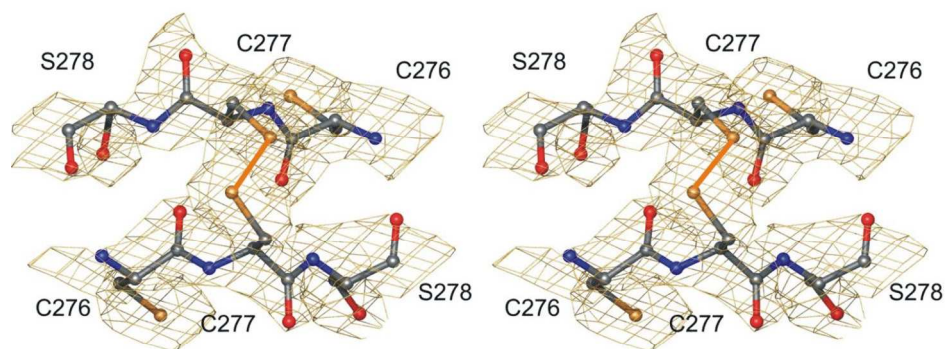

**Sulfhydryl Groups and a Disulfide Bond in Yeast ADH1.** Commercial yeast ADH is typically prepared from brewer's yeast, *Saccharomyces carlsbergensis*.<sup>1</sup> This ADH1 has four amino acid substitutions relative to the laboratory strain, *S. cerevisiae*, ADH1 (V58T, Q127E, Q147E and I151V), which account for the more negative charge of the commercial enzyme as compared to *S. cerevisiae* ADH1. The substitutions are not near the active site and do not affect catalytic activity significantly. A commercial preparation crystallized from ammonium sulfate, with purity (enzyme activity, active site titrations, and gel electrophoresis) similar to the preparations used for crystallography was studied for the presence of a disulfide bond.

Titration of free sulfhydryl groups with 5,5'-dithio-bis-(2-nitrobenzoic acid)<sup>2</sup> (with or without denaturation) showed about 6 free SH groups per subunit, and after treatment with dithiothreitol and desalting, 7 free SH groups were found. (The amino acid sequence contains 8 cysteine residues per subunit.) Evidence for a disulfide bond was obtained by a differential labeling protocol in which free cysteines were carboxymethylated in enzyme denatured with guanidinium chloride, followed by reducing the protein with dithiothreitol and labeling the newly formed cysteines with vinylpyridine. The modified protein had a molecular mass (Bruker Daltonics Biflex II MALDI-TOF) of  $37,181 \pm 14$  Da, relative to an internal standard of horse liver alcohol dehydrogenase E isoenzyme (39,845 with an *N*-terminal acetyl group), which fits most closely with *S. carlsbergensis* ADH1 with 7 carboxymethylcysteines and 1 pyridylethylcysteine per molecule (predicted 37,194 Da). (The subunit mass of native *S. carlsbergensis* ADH1 was estimated to be 36,682 Da, relative to the calculated value of 36,708, so it appears that any post-translational modifications, e.g., phosphorylation, are minimal.) Amino acid analysis found 6.1 carboxymethylcysteines per molecule, and about 1.5 pyridylethylcysteine (not determined accurately because it co-chromatographed with lysine and was estimated by difference).

The differentially-labeled protein was digested with trypsin and the peptides were separated by reverse phase HPLC and analyzed by MS. Masses for all 30 peptides expected were found, including the amino terminal *N*-acetylheptapeptide. (Sequences of peptides with masses of 288, 429, 614, 1009, 1369, and 1391 were not determined.) The peptide including residues 276 to 286 had a mass consistent with modification by one carboxymethyl group and one pyridylethyl group. Since cysteine residues 276 and 277 are in this peptide, it was not possible to determine which cysteine residue was in disulfide linkage, but the X-ray crystallography demonstrates that the bond is between Cys-277 of the two subunits that make up the dimer, labeled A and B, or C and D. It appears that the disulfide bond is present in purified and crystallized enzyme and is not affected by X-irradiation. The status of the cysteines in ADH in living yeast cells is not known. .

The effects of dithiothreitol on ADH1 are complicated. Storage of crystalline yeast ADH in ammonium sulfate leads to loss of activity, oxidation of sulfhydryl groups and dissociation to monomers, and treatment of aged enzyme with 2-mercaptoethanol or dithiothreitol can partially restore activity.<sup>3</sup> We find that treatment of fresh samples of *S. cerevisiae* ADH1 or older, crystallized *S. carlsbergensis* ADH1 with 4 or 18 mM dithiothreitol at pH 8 and 25 °C can increase activity transiently (in a few minutes) by 10–20%, apparently due to reduction of a disulfide bond, but activity decreases after 20 h to less than 10% of the initial activity. Perhaps dithiothreitol slowly destabilizes the enzyme by chelating zinc. ADH1 is also very susceptible to thiol reagents, as we find that 0.1 mM 5,5'-dithio-bis-(2-nitrobenzoic acid) or 1 mM sodium tetrathionate inactivate the enzyme in 1 day.

**Structural Homology of Medium-Chain ADHs.** The medium-chain ADHs are homologous, and it is of interest to identify the common core elements among the three-dimensional structures. Sequence alignments of 13 diverse dimeric and tetrameric ADHs for which three-dimensional structures have been determined (Table 3S) suggest 54–63% identities among the dimeric horse, cod, mouse and human ADHs, 37–64% identity among the tetrameric *E. coli* (BADH<sup>9</sup> or 4gkv.pdb), *Bacillus stearothermophilus*, *Pseudomonas aeruginosa*, and yeast ADHs, whereas five other ADHs (PDB entries 1qor, 1ped, 1e3j, 1jvb and 1h2b) were less than 39% identical to any of the other ADHs.

The structural core was determined by initial automated superpositioning followed by multiple, manual alignments, using program O<sup>4</sup> with the criterion that the  $\alpha$ -carbon atoms of the structural elements were in similar conformations. Subunit A, or its two domains, of yeast ADH1 was compared to one subunit of the other structures. The alignments identified 16 common core elements (15 gaps), comprising 248 amino acid residues (Table 4S). (A structural alignment of 6 tetrameric ADHs and the dimeric horse ADH identified 190 structurally equivalent residues.<sup>5</sup>) These common elements include the  $\beta$ -sheet and 4 flanking  $\alpha$ -helices of the coenzyme binding domain, except for some connecting loops. Such similarity is expected, as the Rossmann fold is common to many divergent dehydrogenases and other enzymes,<sup>6</sup> even though only 4 residues (3 Gly and 1 Asp in NAD-dependent dehydrogenases) are conserved.<sup>7</sup> The “catalytic domains” are not conserved among all enzymes with the Rossmann fold, but for these 13 diverse, medium-chain alcohol dehydrogenases, the catalytic domains are very similar, with the notable difference that the deletion of about 21 residues in the tetrameric enzymes and rearrangements near the structural zinc site (including  $\beta$ -sheet (III)) have altered the structure. (See Ref. 8 for location of structural elements.) There is also a solvent-exposed  $\beta$ -strand on the top of a major  $\beta$ -sheet (I) and a short strand near the amino terminal that vary. Otherwise the differences are associated with connecting loops.

Yeast ADH1 has closest structural homology with the *E. coli* inducible (BADH<sup>9</sup> or 4gkv.pdb) and *P. aeruginosa* ADH structures. Superpositioning of 271 alpha carbon atoms (core regions) of the apoenzyme subunits (no coenzyme bound) of the *E. coli* ADH structure onto the apoenzyme subunits (B and D) of yeast ADH1 gives rmsd values from 1.4–1.5 Å and onto holo-subunits (A and C) of yeast ADH1 gives rmsd values from 1.6–2.1 Å. As compared to *E. coli* ADH, yeast ADH1 has an additional 5 residues at the amino terminus, an insertion at position 14, two inserted residues at position 54, one insertion each at positions 178, 225, 237 and 274, and a deletion at residue 192. As compared to *Pseudomonas* ADH, yeast ADH1 has insertions at positions 178, 225, 237, 273, 346 and 347. Although the structures of the medium chain ADHs are very similar, evolution has led to many differences that affect substrate specificity and catalysis.

**Table 3S. Percent Identity of Diverse Alcohol Dehydrogenases by Sequence Alignments<sup>a</sup>**

| PDB  | 4dxh | 1cdo | 1e3i | 1teh | 1qor | 1ped | 1e3j | 1jvb | 1h2b | 4gkv | 1rjw | 1llu | 4w6z |
|------|------|------|------|------|------|------|------|------|------|------|------|------|------|
| 4dxh | 100  | 58   | 55   | 62   | 22   | 28   | 22   | 26   | 24   | 24   | 29   | 26   | 22   |
| 1cdo | 58   | 100  | 55   | 64   | 18   | 29   | 23   | 26   | 26   | 24   | 29   | 26   | 24   |
| 1e3i | 55   | 56   | 100  | 55   | 19   | 30   | 24   | 25   | 26   | 26   | 29   | 26   | 23   |
| 1teh | 62   | 64   | 55   | 100  | 23   | 27   | 22   | 27   | 26   | 28   | 30   | 26   | 25   |
| 1qor | 22   | 18   | 19   | 23   | 100  | 18   | 21   | 24   | 23   | 22   | 23   | 22   | 24   |
| 1ped | 27   | 29   | 30   | 27   | 18   | 100  | 25   | 23   | 23   | 20   | 23   | 23   | 20   |
| 1e3j | 22   | 23   | 24   | 22   | 21   | 25   | 100  | 26   | 22   | 20   | 27   | 25   | 27   |
| 1jvb | 26   | 26   | 25   | 27   | 24   | 23   | 26   | 100  | 38   | 31   | 34   | 30   | 31   |
| 1h2b | 24   | 26   | 26   | 26   | 23   | 23   | 22   | 38   | 100  | 32   | 39   | 38   | 30   |
| 4gkv | 24   | 24   | 26   | 28   | 22   | 21   | 21   | 31   | 32   | 100  | 52   | 45   | 37   |
| 1rjw | 29   | 29   | 29   | 30   | 23   | 23   | 27   | 34   | 39   | 52   | 100  | 64   | 43   |
| 1llu | 26   | 27   | 26   | 26   | 22   | 23   | 25   | 30   | 38   | 45   | 64   | 100  | 44   |
| 4w6z | 22   | 23   | 23   | 25   | 24   | 20   | 27   | 31   | 30   | 37   | 43   | 44   | 100  |

<sup>a</sup>Sequence alignments suggest 55–64% identities among the dimeric horse, cod, mouse and human ADHs (4dxh, 1cdo, 1e3i, 1teh); and 37–64% identity among tetrameric ADHs (BADH<sup>9</sup> or 4gkv, 1rjw, 1llu, 4w6z); whereas the other ADHs (1qor, 1ped, 1e3j, 1jvb, 1h2b) were 18–39% identical to any of the other ADHs.

**Table 4S. Common Structural Elements of Diverse Medium-Chain Alcohol Dehydrogenases<sup>a</sup>**

| PDB  | Domain, #residues               | Cat 34             | Cat 33 | Cat 9   | Cat 18               | Coe 10  |
|------|---------------------------------|--------------------|--------|---------|----------------------|---------|
| 4dxh | <i>Equus caballus</i> E         | 21-54              | 61-93  | 144-152 | 155-172              | 174-183 |
| 1cdo | <i>Gadus callarias</i> , cod    | 21-54              | 62-94  | 145-153 | 156-173              | 175-184 |
| 1teh | <i>Homo sapiens</i> ADH3        | 21-54              | 62-94  | 145-153 | 156-173              | 175-184 |
| 1e3i | <i>Mus musculus</i> ADH2        | 21-54              | 61-93  | 148-156 | 159-176              | 178-187 |
| 1qor | <i>E. coli</i> quinone          | 16-49              | 57-89  | 93-101  | 104-121              | 123-132 |
| 1ped | <i>C. beijerinckii</i>          | 12-45              | 53-85  | 118-126 | 131-148              | 150-159 |
| 1e3j | <i>B. argentifolii</i> sorbitol | 16-49              | 60-92  | 123-131 | 134-151              | 152-161 |
| 1jvb | <i>S. solfataricus</i>          | 13-46              | 62-94  | 124-132 | 136-152 <sup>b</sup> | 154-163 |
| 1h2b | <i>Aeropyrum pernix</i>         | 28-62 <sup>c</sup> | 73-105 | 135-143 | 146-166 <sup>d</sup> | 168-177 |
| BADH | <i>E. coli</i> , inducible      | 12-45              | 52-84  | 115-123 | 126-143              | 145-154 |
| 1rjw | <i>B. stearothermophilus</i>    | 13-46              | 55-87  | 118-126 | 129-146              | 148-157 |
| 1llu | <i>P. aeruginosa</i>            | 19-52              | 61-93  | 124-132 | 135-152              | 154-163 |
| 4w6z | <i>S. cerevisiae</i> , ADH1     | 18-51              | 60-92  | 123-131 | 134-151              | 153-162 |

| PDB  | Coe 14               | Coe 12  | Coe 24  | Coe 9   | Coe 23               | Coe 9   | Coe 9                |
|------|----------------------|---------|---------|---------|----------------------|---------|----------------------|
| 4dxh | 186-199              | 201-212 | 219-242 | 250-258 | 261-283              | 287-295 | 300-308              |
| 1cdo | 187-200              | 202-213 | 220-243 | 251-259 | 262-284              | 288-296 | 300-308              |
| 1teh | 187-200              | 202-213 | 220-243 | 251-259 | 262-284              | 288-296 | 301-309              |
| 1e3i | 190-203              | 205-216 | 223-246 | 254-262 | 265-287              | 291-299 | 302-310              |
| 1qor | 135-148              | 151-162 | 168-191 | 197-205 | 209-230 <sup>f</sup> | 233-241 | 245-257 <sup>g</sup> |
| 1ped | 161-174              | 176-187 | 194-217 | 223-231 | 235-257              | 260-268 | 273-281              |
| 1e3j | 163-176              | 178-189 | 195-218 | 229-237 | 240-262              | 265-273 | 276-284              |
| 1jvb | 165-178              | 181-192 | 199-222 | 228-236 | 240-262              | 265-273 | 276-284              |
| 1h2b | 179-194 <sup>c</sup> | 196-207 | 214-237 | 242-250 | 254-276              | 279-287 | 289-297              |
| BADH | 156-169              | 171-182 | 189-212 | 218-226 | 228-250              | 253-261 | 264-272              |
| 1rjw | 159-172              | 174-185 | 191-214 | 220-228 | 230-252              | 255-263 | 266-274              |
| 1llu | 165-178              | 180-191 | 197-220 | 226-234 | 236-258              | 261-269 | 272-280              |
| 4w6z | 164-177              | 180-191 | 197-220 | 227-235 | 238-260              | 263-271 | 275-283              |

| PDB  | Coe 9   | Cat 16  | Cat 13  | Cat 6   | % Ident | Residues in subunit aligned |
|------|---------|---------|---------|---------|---------|-----------------------------|
| 4dxh | 311-319 | 326-341 | 351-363 | 369-374 | 22      | 374, dimer                  |
| 1cdo | 311-319 | 326-341 | 351-363 | 369-374 | 24      | 374, dimer                  |
| 1teh | 312-320 | 327-342 | 352-364 | 370-375 | 25      | 373, dimer A3-A375          |
| 1e3i | 313-321 | 328-343 | 353-365 | 371-376 | 23      | 376, dimer                  |
| 1qor | 258-266 | 278-293 | 303-315 | 322-327 | 24      | 326, dimer A2-A327          |
| 1ped | 287-295 | 300-315 | 326-338 | 346-351 | 20      | 351, tetramer               |
| 1e3j | 288-296 | 299-314 | 324-336 | 344-349 | 26      | 348, tetramer A4-A351       |
| 1jvb | 288-296 | 300-315 | 323-335 | 342-347 | 31      | 347, tetramer               |
| 1h2b | 301-309 | 313-328 | 335-347 | 354-359 | 30      | 343, tetramer, A17-A359     |
| BADH | 276-284 | 288-303 | 310-322 | 329-334 | 37      | 336, tetramer               |
| 1rjw | 278-286 | 290-305 | 312-324 | 331-336 | 43      | 339, tetramer               |
| 1llu | 284-292 | 296-311 | 318-330 | 337-342 | 44      | 341, tetramer A2-A342       |
| 4w6z | 287-295 | 299-314 | 321-333 | 340-345 | 100     | 347, tetramer               |



<sup>a</sup>The number of residues in elements of the catalytic (“Cat”) and coenzyme-binding (“Coe”) domains is indicated at the top of the columns. In some cases, the domains were superimposed separately because the conformational change differs among crystal forms. The residue numbers across from the Protein Data Bank entries correspond to the residue numbers for that particular structure that are in the common elements. The alignments are based on inspection of superimposed structures, with the criterion that superimposed C $\alpha$  atoms were in similar conformations. Automated alignments were used for initial superpositioning.<sup>10</sup> The structure for BADH was obtained from Hans Eklund.<sup>9</sup> “% Ident” refers to sequence alignment with yeast ADH1. (See also Table 3S.) The program PDBeFold<sup>11</sup> identified 15 common structural elements for 275 amino acid residues, approximately agreeing with those identified here. <sup>b</sup>Shorter sequence due to deletion at residue 142. <sup>c</sup>Insertion of one residue at position 43. <sup>d</sup>Addition of three residues at 156. <sup>e</sup>Insertion of two residues at position 181. <sup>f</sup>Deletion of one residue at position 218. <sup>g</sup>Insertion of four residues at position 246.

**Zinc Content and Coordination.** The determination of total zinc in yeast ADH1 has produced differing results. One per subunit (four per tetramer) was reported early on,<sup>12,13</sup> but another study found two per subunit.<sup>14</sup> Later studies with the recombinant D49N or E67Q enzymes found two zincs per subunit.<sup>15</sup> Treatment of commercial ADH containing 2 zincs per subunit with dithiothreitol decreases zinc content by half, presumed to be loss of the structural zinc, making the enzyme labile to heat treatment at 50 °C, but without decreasing the initial enzyme activity; incubation with 10 μM ZnCl<sub>2</sub> restores the zinc content to 2 per subunit and also increases activity of the commercial preparation, perhaps by zinc binding to the active site.<sup>16</sup> The differing results from various laboratories could be due to the purification and treatment of the enzyme, but preparations from two different procedures gave nearly identical results.<sup>17</sup> We purified recombinant yeast ADH1 by a new procedure that avoids the 5 day autolysis at room temperature and crystallization with high concentrations of ammonium sulfate, and instead uses a bead beater for disruption of wet cells, ion exchange chromatography on DEAE-Sepharose and hydrophobic interaction chromatography on Octyl-Sepharose. Specific enzyme activities are generally comparable to those for the best commercial preparations. In any case, the crystallography confirms that two zincs per subunit are present in the structure.

The coordination of the structural zincs with four cysteine residues is similar to that in dimeric horse liver ADH and some tetrameric ADHs (*E. coli*, *P. aeruginosa*, *B. stearothermophilus*, and *B. argentifolii*), but the hyperthermophilic archaeon tetrameric ADHs from *S. solfataricus* and *A. pernix* have the zinc coordinated to an aspartic acid instead of Cys-97. Two tetrameric NADP-dependent bacterial ADHs (*T. Brockii* and *C. beijerinckii*) do not have structural zinc in their monomers, but the structural peptide lobe is maintained by an electrostatic interaction and a hydrogen bond.<sup>18</sup> Apparently the “structural zinc” lobe does not require a zinc, but the functional role of this zinc is not yet clear. The dimeric quinone oxidoreductase has no zincs, but the enzyme does bind NADPH and catalyzes reduction of some quinones.<sup>19</sup>

**Table 5S. Coordination Distances for the Zincs**

| Zinc site/atoms                      | subunit |     |     |     |
|--------------------------------------|---------|-----|-----|-----|
|                                      | A       | B   | C   | D   |
| catalytic                            |         |     |     |     |
| Cys-43 SG                            | 2.3     | 2.5 | 2.3 | 2.3 |
| Cys-153 SG                           | 2.4     | 2.6 | 2.5 | 2.7 |
| His-66 NE2                           | 2.0     | 2.2 | 2.1 | 2.2 |
| CF <sub>3</sub> CH <sub>2</sub> OH O | 1.8     | 3.2 | 1.9 | 2.9 |
| Glu-67 OE2                           | 4.8     | 2.3 | 5.0 | 2.0 |
| structural                           |         |     |     |     |
| Cys-97 SG                            | 2.3     | 2.2 | 2.2 | 2.3 |
| Cys-100 SG                           | 2.3     | 2.3 | 2.2 | 2.3 |
| Cys-103 SG                           | 2.4     | 2.3 | 2.4 | 2.4 |
| Cys-111 SG                           | 2.4     | 2.3 | 2.3 | 2.6 |

**Determination of the Concentration of Yeast ADH, its Molecular Weight and Stoichiometry of Coenzyme Binding.** We have routinely used the extinction coefficient based on dry weight ( $\epsilon_{280} = 1.26 \text{ cm}^{-1}\text{mg}^{-1}\text{ml}$ )<sup>20</sup> and a calculated subunit molecular weight of 36,849 for a subunit with an *N*-terminal acetyl group (the initial methionine is removed in processing) and 2 zinc atoms, or a molar extinction coefficient of  $185,720 \text{ M}^{-1}\text{cm}^{-1}$  and a tetramer molecular weight of 147,396. Preparations of the purified enzyme have an  $A_{280}/A_{260}$  ratio of 1.82, indicating that extraneous nucleotide is not present. We determined the protein concentration by amino acid analysis (using norleucine as an internal standard) and obtained the same  $\epsilon_{280}$  of  $1.27 \text{ cm}^{-1}\text{mg}^{-1}\text{ml}$ . However, values of  $1.46^3$  and  $1.23 \pm 0.01^{13}$  were also reported. Using the estimated extinction coefficients for tyrosine, tryptophan, and cystine in a folded protein<sup>21</sup>, we calculate a value of 1.31. We also used the UV spectrum of the protein in 0.1 N NaOH and extinction coefficients for tyrosine and tryptophan<sup>22</sup> to determine the protein concentration (14 tyrosine and 5 tryptophan residues) and a calculated  $\epsilon_{280}$  of  $1.36 \text{ cm}^{-1}\text{mg}^{-1}\text{ml}$ . Thus, the values vary by up to 15 %.

Molecular weights of 150,000 and 141,000 were determined by sedimentation velocity and diffusion experiments, but aged preparations also contained perhaps 10% of inactive monomeric enzyme.<sup>3,20</sup> These various considerations lead to uncertainties of 20% or more in determination of the concentration of active sites of the protein.

Binding of NADH gave linear Scatchard plots with 3.6 NADH binding per tetramer, and enzyme kinetics also had a linear dependence with  $\text{NAD}^+$  or NADH (Eadie-Hofstee-Scatchard plots), providing no evidence for cooperativity in binding.<sup>20</sup> Later it was found that the stoichiometry was 3.0 NADH per tetramer.<sup>17</sup> Further work found that the tetramer could bind 2 NADH and be inactivated by reaction with 2 iodoacetate molecules, but these preparations had 4.3–5.0 zinc atoms per tetramer.<sup>23</sup> The stoichiometry of NADH binding was also determined by circular dichroism and a gel filtration method to be 4 per tetramer, for enzyme with 4 zinc atoms per tetramer.<sup>13</sup> Binding of coenzyme in binary or ternary complexes estimated by fluorescence changes gave linear Hill plots with slopes of 1.0, but stoichiometry was not determined.<sup>24</sup>

**Classical and Alternative Coordination of the Catalytic Zinc in Alcohol Dehydrogenases.** (Refer to Table 6S, following). The classical coordination was described for horse liver ADH in studies with the apoenzyme, which has a water molecule ligated to the zinc, as well as with ternary complexes with coenzyme and a substrate analogue.<sup>8,25-27</sup> Dimeric human ADH3 apoenzyme also has the classical coordination (1m6h.pdb), as does the abortive ternary complex with NADH and the alcohol substrate (1mc5.pdb). The classical coordination is found in ternary holoenzyme complexes of *S. solfataricus* (1r37.pdb), *A. pernix* (1h2b.pdb), and *P. aeruginosa* (1llu.pdb) ADHs. In contrast, and similar to *S. cerevisiae* ADH1, the alternative coordination is found in dimeric and tetrameric apoenzymes from *C. beijerinckii* (1ped.pdb), *S. solfataricus* (1jvb.pdb), *B. argentifolii* (1e3j.pdb), and *H. sapiens* (1p17.pdb, sorbitol dehydrogenase). Note that the coordinating glutamate residue is the next residue in the amino acid sequence after the conserved histidine that ligates the zinc. For other structures, however, the picture is more complicated. Complexes of *C. beijerinckii* (1kev.pdb), *T. brockii* (1ykf.pdb), and *E. coli* (4gkv.pdb or Ref. 9) ADHs with NAD(P) have both forms of coordination (perhaps a consequence of partial occupancy by coenzyme). In the complex of *B. stearothersophilus* ADH complexed with TFE (1rjw.pdb), two of the subunits have the classical coordination, but the other two may have low occupancy zinc in the alternative coordination ligated to Glu-62.<sup>5</sup>

Coordination with other metals may also be flexible, as shown in various studies. In one subunit of horse ADH where  $\text{Cd}^{2+}$  has replaced the catalytic zinc, OE2 of the carboxyl group Glu-68 is positioned 3.0 Å from the  $\text{Cd}^{2+}$  and a water is 2.3 Å from the  $\text{Cd}^{2+}$  in a bipyramidal coordination, but the electron density is elongated, which would be consistent with alternative positions for the metal.<sup>28</sup> EPR studies on horse enzyme with  $\text{Co}^{2+}$  replacing the catalytic zinc suggested, on the basis of comparison of zero field splitting constants with model compounds and calculations, that the  $\text{Co}^{2+}$  was pentacoordinate in complexes with  $\text{NAD}^+$  or  $\text{NAD}^+$ -pyrazole,<sup>29</sup> but the x-ray structures clearly show the zinc is tetracoordinate.<sup>30</sup>

The homologous *C. beijerinckii* and *T. brockii* ADHs are interesting because Asp-150 replaces the Cys-153 found in yeast ADH1, and the apoenzyme form is tetracoordinated with Cys-37, His-59, Glu-60 and Asp-150 (1ped.pdb), similar to the “alternative” position in yeast ADH1 subunits B and D, whereas the binary complexes with NADPH lose the inner-sphere coordination with Glu-60 (1kev.pdb, 1ykf.pdb). X-Ray absorption data on the *T. brockii* apoenzyme or complexes with  $\text{NADP}^+$  or NADPH were consistent with the tetracoordination, but data for ternary complexes with  $\text{NADP}^+$  or NADPH with the product analog dimethylsulfoxide were best described by penta- or hexa-coordination.<sup>31</sup> A three-dimensional model was built that could explain the results. However, no three-dimensional structures are available for ternary complexes, and X-ray absorption studies with the  $\text{Co}^{2+}$ -substituted *T. brockii* ADH suggested that the cobalt formed an octahedral complex, even when  $\text{NADP}^+$  and dimethylsulfoxide were bound.<sup>32</sup> (In these experiments, the concentrations of ligands were not specified, and it is expected that dimethylsulfoxide binds best to ADHs with the reduced coenzyme.)

Binary or ternary complexes of *Haloferax mediterranei* glucose dehydrogenase have three different tetracoordinated structures for the catalytic zinc, all of which ligate His-63 and a water, but differ in the relative positions of the zinc, the water, and ligation to other groups.<sup>33</sup> The binary complexes with NADP(H) have zinc ligated also to Glu-64 and Glu-150, whereas a

ternary complex formed with  $\text{NADP}^+$  and glucose has Asp-38 and O1 of glucose as ligands. (In these structures, the oxidation state of  $\text{NADP}^+$  is not established by the crystallography, and partial occupancies for catalytic zincs complicate the interpretations of the electron density maps.) A mechanism is proposed in which the adjacent bound water (as hydroxide) deprotonates the O1 hydroxyl group of glucose when hydride is transferred from C1 of glucose to the nicotinamide ring; the authors suggest that the “text book” mechanism for medium chain ADHs requires modification. However, glucose dehydrogenase has Asp-38 and Glu-150 instead of the two cysteine residues found in liver or yeast ADH and the chemistry of the mechanism does not need to be the same as for other ADHs. Moreover, no text book has suggested how the water ligated to zinc in horse or yeast ADHs is replaced by the oxygen of the substrate. Such mechanisms have been discussed in the literature and are considered in the main article.

**Table 6S. Coordination of Catalytic Zinc in Alcohol Dehydrogenases**

| species                              | PDB  | form | substrate ligands           | subunit: zinc ligands, amino acid residues            | comments                                          |
|--------------------------------------|------|------|-----------------------------|-------------------------------------------------------|---------------------------------------------------|
| <i>Equus caballus</i>                | 1ye3 | apo  |                             | C46, H67, C174, H <sub>2</sub> O                      | structural Zn, 4 Cys                              |
| ADH1E                                | 4dxh | holo | NAD, tri-fluoroethanol      | C46, H67, C174, TFE O                                 | ternary complex                                   |
| "                                    | 1p1r | holo | NADH, methylhexyl-formamide | C46, H67, C174, formamide O                           | ternary complex                                   |
| <i>Saccharomyces cerevisiae</i> ADH1 | 4w6z | ~apo | TFE, 2nd sphere             | B, D: no NAD, binary C43, H66, C153, E67              | structural Zn, 4 Cys                              |
| "                                    | 4w6z | holo | NAD, TFE                    | A, C: C43, H66, C153, TFE O                           | ternary complex                                   |
| <i>Homo sapiens</i> ADH3             | 1m6h | apo  |                             | C44, H66, C173, H <sub>2</sub> O                      | structural Zn, 4 Cys                              |
| "                                    | 1m6w | apo  | 12HDDA, binary              | C44, H66, C173, OR                                    | mix of H <sub>2</sub> O, OH of hydroxydodecanoate |
| "                                    | 1teh | holo | NAD(H)                      | A: C44, H66, C173, E67, H <sub>2</sub> O              | ~ bipyramidal, binary                             |
| "                                    | 1teh | holo | NAD(H)                      | B: C44, H66, C173, E67                                | binary                                            |
| "                                    | 2fze | apo  | ADP-ribose                  | 75% A, B: C44, H66, C173, H <sub>2</sub> O            | A, B subunits have alternative Zn sites           |
| "                                    | 2fze | apo  | ADP-ribose                  | 25% A, B: C44, H66, C173, E67                         | Each zinc is tetracoordinate                      |
| "                                    | 1mao | holo | NAD, DDA inhibited          | C44, H66, C173, E67                                   | -CH <sub>3</sub> of dodecanoate close to Zn       |
| "                                    | 1mc5 | holo | NADH, HMGS                  | A: C44, H66, C173, OH of HMGS                         | hydroxymethylglutathione, abortive                |
| "                                    | 1mc5 | holo | NADH                        | B: C44, H66, C173, E67, H <sub>2</sub> O              | ~ bipyramidal, binary                             |
| <i>Clostridium beijerinckii</i>      | 1ped | apo  |                             | C37, H59, D150, E60                                   | no structural Zn (Trp, Leu, Gln, Asn)             |
| "                                    | 1kev | holo | NADP(H)                     | A, C, D: C37, H59, D150, S39 2 <sup>nd</sup> sphere   | low NADP(H) occupancy                             |
| "                                    | 1kev |      |                             | B: C37, H59, D150, E60                                | low NADP(H) occupancy                             |
| <i>Thermoanaerobacter brockii</i>    | 1ykf | holo | NADP(H)                     | A, B: C37, H59, D150, S39, E60 2 <sup>nd</sup> sphere | low NADP(H) occupancy, no structural Zn           |
| "                                    | 1ykf | holo | NADP(H)                     | C, D: C37, H59, D150, S39 2 <sup>nd</sup> sphere      |                                                   |
| <i>Sulfolobus solfataricus</i>       | 1jvb | apo  |                             | C38, H68, C154, E69                                   | structural Zn 3Cys, Glu                           |
| "                                    | 1r37 | holo | NADH ethoxyethanol          | C38, H68, C154, EtOEtO                                | ternary                                           |

|                                                     |              |      |                                    |                                                                                    |                                                              |
|-----------------------------------------------------|--------------|------|------------------------------------|------------------------------------------------------------------------------------|--------------------------------------------------------------|
| <i>Aeropyrum pernix</i>                             | 1h2b         | holo | NADH, octanoate                    | C54, H79, D168, octanoate carboxyl                                                 | structural Zn, 3 Cys, Asp; or disulfide                      |
| <i>E. coli</i> , inducible ADH                      | none         | apo  |                                    | A: C37, H58, C145, H <sub>2</sub> O<br>B, C, D: C37, H58, C145, E59                | structural Zn, 4 Cys                                         |
| "                                                   | none         | holo | NAD                                | A: C37, H58, C145, E59<br>B, C, D: C37, H58, C145, H <sub>2</sub> O                | no NAD in subunit A, binary complex                          |
| "                                                   | 4gkv         | holo | NAD                                | C37, H58, C145, H <sub>2</sub> O                                                   | binary                                                       |
| <i>Bacillus stearothermophilus</i>                  | 1rjw         | apo  | TFE                                | C38, H61, C148, TFE, but A and C subunits may have low occupancy Zn ligated to E62 | structural Zn, 4 Cys<br>55% ident to <i>E. coli</i> , binary |
| <i>Pseudomonas aeruginosa</i>                       | 1llu         | holo | NADH, ethyleneglycol               | C44, H67, C154, glycol, abortive complex                                           | structural Zn, 4 Cys                                         |
| <i>Bemisia argentifolii</i> ketose reductase        | 1e3j         | apo  |                                    | C41, H66, E67, H <sub>2</sub> O                                                    | structural Zn, 4 Cys                                         |
| <i>Homo sapiens</i> sorbitol dehydrogenase          | 1pl7         | apo  |                                    | C44, H69, E70, H <sub>2</sub> O                                                    | Glu70 is displaced by inhibitor ligated to Zn                |
| "                                                   | 1pl8         | holo | NAD                                | C44, H69, E70, H <sub>2</sub> O                                                    |                                                              |
| "                                                   | 1pl6         | holo | NAD, SDI-158 inhibitor             | C44, H69, H <sub>2</sub> O, N1 and O30 of SDI-158                                  | SDI-158 chelates Zn in pentacoordination                     |
| <i>Haloferax mediterranei</i> glucose dehydrogenase | 2vwp<br>2vwq | holo | NADP(H) binary                     | H63, E64, E150, H <sub>2</sub> O, D38 nearby                                       |                                                              |
| "                                                   | 2vwh         | holo | NADP, glucose                      | D38, H63, H <sub>2</sub> O, Glucose O1                                             | E64 and E150 ligate water on zinc                            |
| "                                                   | 2vwg         | holo | NADP <sup>+</sup> , gluconolactone | D38, H63, E64, H <sub>2</sub> O                                                    | abortive complex                                             |

## References

- (1) Pal, S., Park, D. H., and Plapp, B. V. (2009) Activity of yeast alcohol dehydrogenases on benzyl alcohols and benzaldehydes. Characterization of ADH1 from *Saccharomyces carlsbergensis* and transition state analysis. *Chem.-Biol. Interact.* 178, 16-23.
- (2) Riddles, P. W., Blakeley, R. L., and Zerner, B. (1983) Reassessment of Ellman's reagent. *Methods Enzymol.* 91, 49-60.
- (3) Bühner, M., and Sund, H. (1969) Yeast alcohol dehydrogenase: SH groups, disulfide groups, quaternary structure, and reactivation by reductive cleavage of disulfide groups. *Eur. J. Biochem.* 11, 73-79.
- (4) Jones, T. A., Zou, J. Y., Cowan, S. W., and Kjeldgaard, M. (1991) Improved methods for building protein models in electron density maps and the location of errors in these models. *Acta Crystallogr. A* 47 (Pt 2), 110-119.
- (5) Ceccarelli, C., Liang, Z. X., Strickler, M., Prehna, G., Goldstein, B. M., Klinman, J. P., and Bahnson, B. J. (2004) Crystal structure and amide H/D exchange of binary complexes of alcohol dehydrogenase from *Bacillus stearothermophilus*: Insight into thermostability and cofactor binding. *Biochemistry* 43, 5266-5277.
- (6) Rossmann, M. G., Liljas, A., Brändén, C.-I., Banaszak, L. J. (1975) Evolutionary and structural relationships among dehydrogenases. *The Enzymes*, 3rd ed. 11, 62-102.
- (7) Plapp, B. V. (1982) Origins of Structure and Function of Proteins. In *Perspectives in Evolution* (Milkman, R., Ed.), pp 129-147, Sinauer Associates, Sunderland, MA.
- (8) Eklund, H., Nordström, B., Zeppezauer, E., Söderlund, G., Ohlsson, I., Boiwe, T., Söderberg, B. O., Tapia, O., Brändén, C.-I., and Åkeson, Å. (1976) Three-dimensional structure of horse liver alcohol dehydrogenase at 2.4 Å resolution. *J. Mol. Biol.* 102, 27-59.
- (9) Karlsson, A., el-Ahmad, M., Johansson, K., Shafqat, J., Jörnvall, H., Eklund, H., and Ramaswamy, S. (2003) Tetrameric NAD-dependent alcohol dehydrogenase. *Chem.-Biol. Interact.* 143-144, 239-245.
- (10) Holm, L., and Rosenström, P. (2010) Dali server: Conservation mapping in 3D. *Nucleic Acids Res.* 38, W545-549.
- (11) Krissinel, E., and Henrick, K. (2004) Secondary-structure matching (SSM), a new tool for fast protein structure alignment in three dimensions. *Acta Crystallogr. D* 60, 2256-2268.
- (12) Vallee, B. L., and Hoch, F. L. (1955) Zinc, a component of yeast alcohol dehydrogenase. *Proc. Natl. Acad. Sci. U.S.A.* 41, 327-338.
- (13) Sytkowski, A. J. (1977) Metal stoichiometry, coenzyme binding, and zinc and cobalt exchange in highly purified yeast alcohol dehydrogenase. *Arch. Biochem. Biophys.* 184, 505-517.
- (14) Klinman, J. P., and Welsh, K. (1976) The zinc content of yeast alcohol dehydrogenase. *Biochem. Biophys. Res. Commun.* 70, 878-884.
- (15) Ganzhorn, A. J., and Plapp, B. V. (1988) Carboxyl groups near the active site zinc contribute to catalysis in yeast alcohol dehydrogenase. *J. Biol. Chem.* 263, 5446-5454.
- (16) Magonet, E., Hayen, P., Delforge, D., Delaive, E., and Remacle, J. (1992) Importance of the structural zinc atom for the stability of yeast alcohol dehydrogenase. *Biochem. J.* 287, 361-365.
- (17) Dickinson, F. M. (1970) The binding of dihydronicotinamide-adenine dinucleotide and pyridine-3-aldehyde-adenine dinucleotide by yeast alcohol dehydrogenase. *Biochem. J.* 120, 821-830.



- (18) Korkhin, Y., Kalb, G., Peretz, M., Bogin, O., Burstein, Y., and Frolow, F. (1998) NADP-dependent bacterial alcohol dehydrogenases: Crystal structure, cofactor-binding and cofactor specificity of the ADHs of *Clostridium beijerinckii* and *Thermoanaerobacter brockii*. *J. Mol. Biol.* 278, 967-981.
- (19) Thorn, J. M., Barton, J. D., Dixon, N. E., Ollis, D. L., and Edwards, K. J. (1995) Crystal structure of *Escherichia coli* QOR quinone oxidoreductase complexed with NADPH. *J. Mol. Biol.* 249, 785-799.
- (20) Hayes, J. E., Jr., and Velick, S. F. (1954) Yeast alcohol dehydrogenase: Molecular weight, coenzyme binding, and reaction equilibria. *J. Biol. Chem.* 207, 225-244.
- (21) Pace, C. N., Vajdos, F., Fee, L., Grimsley, G., and Gray, T. (1995) How to measure and predict the molar absorption coefficient of a protein. *Protein Sci* 4, 2411-2423.
- (22) Lundblad, R. L., and Macdonald, F. (2010) *Handbook of Biochemistry and Molecular Biology*, CRC Press, Boca Raton.
- (23) Dickinson, M. (1974) Measurements of the concentration of active sites in preparations of yeast alcohol dehydrogenase. *Eur. J. Biochem.* 41, 31-36.
- (24) Karlović, D., Amiguet, P., Bonner, F. J., and Luisi, P. L. (1976) Spectroscopic investigation of binary and ternary coenzyme complexes of yeast alcohol dehydrogenase. *Eur. J. Biochem.* 66, 277-284.
- (25) Eklund, H., Samama, J. P., Wallén, L., Brändén, C. I., Åkeson, Å., and Jones, T. A. (1981) Structure of a triclinic ternary complex of horse liver alcohol dehydrogenase at 2.9 Å resolution. *J. Mol. Biol.* 146, 561-587.
- (26) Plapp, B. V., and Ramaswamy, S. (2012) Atomic-resolution structures of horse liver alcohol dehydrogenase with NAD<sup>+</sup> and fluoroalcohols define strained Michaelis complexes. *Biochemistry* 51, 4035-4048.
- (27) Venkataramaiah, T. H., and Plapp, B. V. (2003) Formamides mimic aldehydes and inhibit liver alcohol dehydrogenases and ethanol metabolism. *J. Biol. Chem.* 278, 36699-36706.
- (28) Meijers, R., Adolph, H. W., Dauter, Z., Wilson, K. S., Lamzin, V. S., and Cedergren-Zeppezauer, E. S. (2007) Structural evidence for a ligand coordination switch in liver alcohol dehydrogenase. *Biochemistry* 46, 5446-5454.
- (29) Makinen, M. W., and Yim, M. B. (1981) Coordination environment of the active-site metal ion of liver alcohol dehydrogenase. *Proc. Natl. Acad. Sci. U.S.A.* 78, 6221-6225.
- (30) Rubach, J. K., and Plapp, B. V. (2003) Amino acid residues in the nicotinamide binding site contribute to catalysis by horse liver alcohol dehydrogenase. *Biochemistry* 42, 2907-2915.
- (31) Kleifeld, O., Frenkel, A., Bogin, O., Eisenstein, M., Brumfeld, V., Burstein, Y., and Sagi, I. (2000) Spectroscopic studies of inhibited alcohol dehydrogenase from *Thermoanaerobacter brockii*: Proposed structure for the catalytic intermediate state. *Biochemistry* 39, 7702-7711.
- (32) Kleifeld, O., Rulisek, L., Bogin, O., Frenkel, A., Havlas, Z., Burstein, Y., and Sagi, I. (2004) Higher metal-ligand coordination in the catalytic site of cobalt-substituted *Thermoanaerobacter brockii* alcohol dehydrogenase lowers the barrier for enzyme catalysis. *Biochemistry* 43, 7151-7161.
- (33) Baker, P. J., Britton, K. L., Fisher, M., Esclapez, J., Pire, C., Bonete, M. J., Ferrer, J., and Rice, D. W. (2009) Active site dynamics in the zinc-dependent medium chain alcohol dehydrogenase superfamily. *Proc. Natl. Acad. Sci. U.S.A.* 106, 779-784.
